# Supplementary material for: Breaking the plane: B5H5 is a three-dimensional structure
Source: Royal Society of Chemistry journal article supplement (doi:10.1039/d4cp00029c), 2024-01-01
Supplement: d4cp00029c3.pdf [file d4cp00029c3.pdf]

# Supporting Information

## Breaking the Plane: $B_5H_5$ is a Three-Dimensional Structure

Gerardo Hernández-Juárez,<sup>1</sup> Jorge Barroso,<sup>2</sup> Alejandro Vásquez-Espinal,<sup>3</sup> Filiberto Ortiz-Chi,<sup>4</sup> William Tiznado,<sup>5</sup> Fernando Murillo,<sup>1,\*</sup> and Gabriel Merino.<sup>1,\*</sup>

<sup>1</sup> *Departamento de Física Aplicada, Centro de Investigación y de Estudios Avanzados, Unidad Mérida. Km 6 Antigua Carretera a Progreso. Apdo. Postal 73, Cordemex, 97310, Mérida, Yuc., México.*

<sup>2</sup> *Department of Chemistry, Clemson University, Clemson, South Carolina 29625, USA*

<sup>3</sup> *Química y Farmacia, Facultad de Ciencias de la Salud, Universidad Arturo Prat, Casilla 121, Iquique 1100000, Chile.*

<sup>4</sup> *CONAHCYT-División Académica de Ciencias Básicas, Universidad Juárez Autónoma de Tabasco, Cunduacán 86690, Tabasco, México.*

<sup>5</sup> *Departamento de Ciencias Químicas, Facultad de Ciencias Exactas, Universidad Andres Bello, República 498, Santiago, Chile.*

[gmerino@cinvestav.mx](mailto:gmerino@cinvestav.mx)

[fernando.murillo@cinvestav.mx](mailto:fernando.murillo@cinvestav.mx)

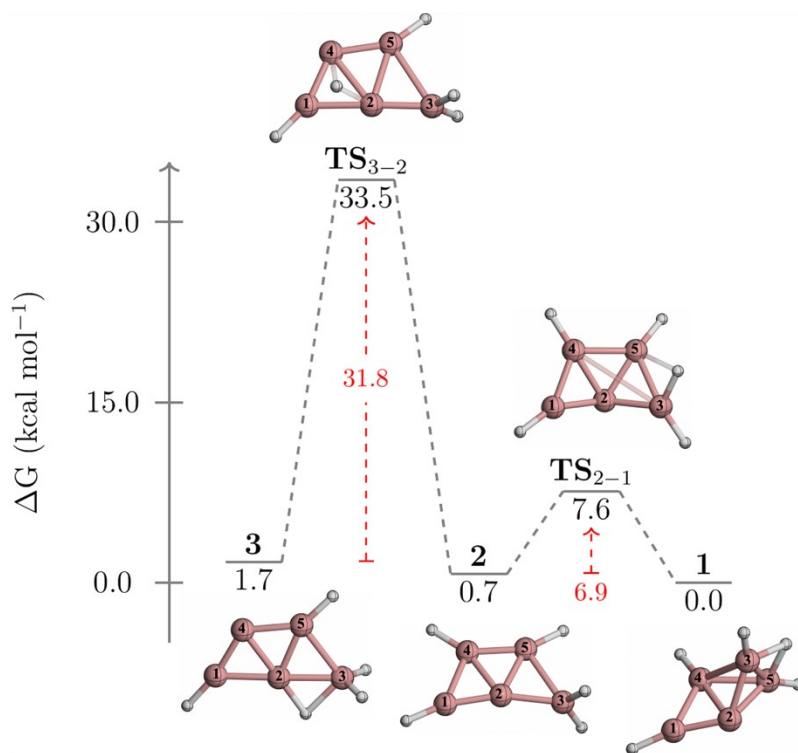

**Figure S1.** Gibbs energy profile for converting **3** to **1**, with **2** acting as an intermediate, computed at the CCSD(T)/aug-cc-pVTZ//TPSS/def2-TZVP level of theory.

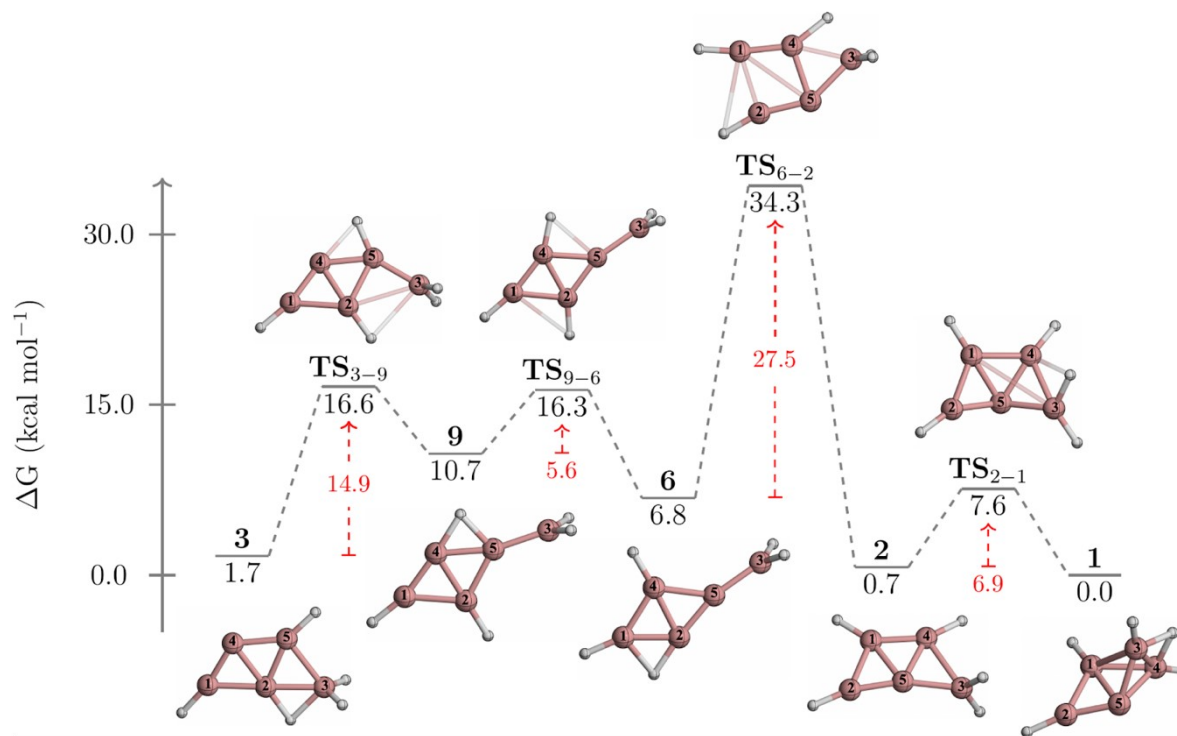

**Figure S2.** Gibbs energy profile for the transformation of **3** to **1** via a stepwise mechanism computed at the CCSD(T)/aug-cc-pVTZ//TPSS/def2-TZVP level of theory.

**Table S1.** T1 diagnostic values computed at the CCSD/aug-cc-pVTZ level of theory.

| <b>Isomer</b> | <b>T1</b> |
|---------------|-----------|
| <b>1</b>      | 0.016     |
| <b>2</b>      | 0.017     |
| <b>3</b>      | 0.015     |
| <b>4</b>      | 0.017     |
| <b>5</b>      | 0.016     |
| <b>6</b>      | 0.017     |
| <b>7</b>      | 0.015     |
| <b>8</b>      | 0.015     |
| <b>9</b>      | 0.018     |
| <b>10</b>     | 0.015     |
| <b>11</b>     | 0.019     |
| <b>12</b>     | 0.014     |
| <b>13</b>     | 0.023     |
| <b>14</b>     | 0.021     |

## Cartesian Coordinates

1

CCSD(T)/aug-cc-pvtz//TPSS/def2-TZVP

G = -126.84440 a.u.

|   |              |              |              |
|---|--------------|--------------|--------------|
| H | -2.272247000 | 0.637942000  | 1.033121000  |
| B | 0.000000000  | 0.467525000  | 0.000000000  |
| B | 1.046498000  | -0.766147000 | 0.000000000  |
| H | -2.272247000 | 0.637942000  | -1.033121000 |
| B | -0.526746000 | -1.041237000 | 0.000000000  |
| B | 1.472562000  | 0.908938000  | 0.000000000  |
| H | 2.086120000  | -1.335786000 | 0.000000000  |
| B | -1.694141000 | 0.479891000  | 0.000000000  |
| H | -1.496864000 | -1.725293000 | 0.000000000  |
| H | 2.464375000  | 1.540350000  | 0.000000000  |

2

CCSD(T)/aug-cc-pvtz//TPSS/def2-TZVP

G = -126.84034 a.u.

|   |              |              |              |
|---|--------------|--------------|--------------|
| B | -0.278751000 | 0.388276000  | -0.712519000 |
| H | -2.847467000 | 0.224037000  | 0.004310000  |
| B | -1.682486000 | 0.177770000  | -0.167247000 |
| B | -0.389074000 | -0.648758000 | 0.590987000  |
| H | -0.512873000 | -1.453865000 | 1.453619000  |
| B | 1.087802000  | -0.611565000 | -0.373350000 |
| B | 0.939894000  | 0.848161000  | 0.321991000  |
| H | 1.252849000  | 1.792339000  | 0.959461000  |
| H | 2.007968000  | 0.144873000  | 0.170266000  |
| H | 1.712602000  | -1.476802000 | -0.886972000 |

3

CCSD(T)/aug-cc-pvtz//TPSS/def2-TZVP

G = -126.84191 a.u.

|   |              |              |              |
|---|--------------|--------------|--------------|
| B | -0.350160000 | -1.099046000 | 0.000000000  |
| B | 1.181881000  | -0.659470000 | 0.000000000  |
| B | 0.000000000  | 0.495686000  | 0.000000000  |
| B | 1.690572000  | 0.774680000  | 0.000000000  |
| B | -1.683976000 | 0.177355000  | 0.000000000  |
| H | -0.891687000 | 1.389385000  | 0.000000000  |
| H | -1.033336000 | -2.067457000 | 0.000000000  |
| H | -2.285182000 | 0.225183000  | 1.031776000  |
| H | -2.285182000 | 0.225183000  | -1.031776000 |
| H | 2.303803000  | 1.781686000  | 0.000000000  |

4

CCSD(T)/aug-cc-pvtz//TPSS/def2-TZVP

G = -126.83561 a.u.

|   |              |              |              |
|---|--------------|--------------|--------------|
| H | 0.842224000  | 1.828284000  | -0.917665000 |
| B | 0.470971000  | 0.875286000  | -0.323165000 |
| H | 2.790196000  | -0.462773000 | -0.168782000 |
| B | 0.131354000  | -0.513267000 | 0.410540000  |
| H | -1.739721000 | -1.691000000 | -0.943109000 |
| B | -1.158643000 | 0.687529000  | 0.250832000  |
| H | -1.640755000 | 1.499555000  | 0.975560000  |
| B | -1.366492000 | -0.766363000 | -0.306554000 |
| B | 1.637677000  | -0.287682000 | 0.001020000  |
| H | 1.173719000  | -1.151579000 | 0.890631000  |

5

CCSD(T)/aug-cc-pvtz//TPSS/def2-TZVP

G = -126.83112 a.u.

|   |              |              |              |
|---|--------------|--------------|--------------|
| H | -0.675937000 | -3.130616000 | 0.000000000  |
| B | 0.649921000  | -0.782845000 | 0.000000000  |
| B | 0.568212000  | 2.323999000  | 0.000000000  |
| H | 0.800929000  | 2.911486000  | 1.020108000  |
| B | -0.499565000 | -1.966449000 | 0.000000000  |
| B | -0.908697000 | -0.433552000 | 0.000000000  |
| H | 0.800929000  | 2.911486000  | -1.020108000 |
| H | 1.785102000  | -1.117318000 | 0.000000000  |
| B | 0.000000000  | 0.818607000  | 0.000000000  |
| H | -1.760381000 | -1.373843000 | 0.000000000  |

6

CCSD(T)/aug-cc-pvtz//TPSS/def2-TZVP

G = -126.83148 a.u.

|   |              |              |              |
|---|--------------|--------------|--------------|
| H | 0.517027000  | -2.400809000 | -0.000000000 |
| B | -0.167441000 | -1.418232000 | -0.000000000 |
| H | -1.355574000 | -1.568718000 | -0.000000000 |
| B | 0.789477000  | -0.099190000 | -0.000000000 |
| H | 0.107663000  | 2.550233000  | 0.000000000  |
| B | -0.167441000 | 0.173272000  | 1.199363000  |
| H | -0.810320000 | 0.203797000  | 2.184868000  |
| B | 0.183150000  | 1.373218000  | 0.000000000  |
| B | -0.167441000 | 0.173272000  | -1.199363000 |
| H | -0.810320000 | 0.203797000  | -2.184868000 |

7

CCSD(T)/aug-cc-pvtz//TPSS/def2-TZVP

G = -126.83193 a.u.

|   |              |              |              |
|---|--------------|--------------|--------------|
| H | 0.000000000  | 0.000000000  | 2.205897000  |
| B | 0.000000000  | 1.196369000  | -0.221088000 |
| H | 0.000000000  | 2.273076000  | -0.712992000 |
| B | 0.000000000  | 0.000000000  | 1.013565000  |
| H | -0.000000000 | -2.273076000 | -0.712992000 |
| B | 1.196369000  | -0.000000000 | -0.221088000 |
| H | 2.273076000  | -0.000000000 | -0.712992000 |
| B | -0.000000000 | -1.196369000 | -0.221088000 |
| B | -1.196369000 | 0.000000000  | -0.221088000 |
| H | -2.273076000 | 0.000000000  | -0.712992000 |

8

CCSD(T)/aug-cc-pvtz//TPSS/def2-TZVP

G = -126.82922 a.u.

|   |              |              |              |
|---|--------------|--------------|--------------|
| H | 1.007334000  | 1.635331000  | -0.000000000 |
| B | 1.351045000  | 0.352223000  | -0.000000000 |
| H | 2.505618000  | 0.137665000  | -0.000000000 |
| B | -0.094017000 | 0.854513000  | 0.000000000  |
| H | -2.550461000 | -0.339226000 | 0.000000000  |
| B | -0.094017000 | -0.394107000 | 1.049091000  |
| H | 0.268348000  | -1.036934000 | 1.973140000  |
| B | -1.368830000 | -0.290502000 | 0.000000000  |
| B | -0.094017000 | -0.394107000 | -1.049091000 |
| H | 0.268348000  | -1.036934000 | -1.973140000 |

9

CCSD(T)/aug-cc-pvtz//TPSS/def2-TZVP

G = -126.82436 a.u.

|   |              |              |              |
|---|--------------|--------------|--------------|
| H | 1.353700000  | 0.680068000  | 0.000000000  |
| B | 0.954062000  | -0.563212000 | 0.000000000  |
| B | 0.585220000  | -2.036200000 | 0.000000000  |
| H | 0.616574000  | -3.213211000 | 0.000000000  |
| B | -0.626919000 | -0.808930000 | 0.000000000  |
| H | -1.796011000 | -0.994195000 | 0.000000000  |
| H | -0.857991000 | 2.821106000  | 1.022847000  |
| H | -0.857991000 | 2.821106000  | -1.022847000 |
| B | -0.604019000 | 2.253489000  | 0.000000000  |
| B | 0.000000000  | 0.731877000  | 0.000000000  |

10

CCSD(T)/aug-cc-pvtz//TPSS/def2-TZVP

G = -126.81449 a.u.

|   |              |              |              |
|---|--------------|--------------|--------------|
| B | -1.063832000 | -0.220834000 | 0.000000000  |
| H | 1.385519000  | 2.648226000  | 1.020881000  |
| B | 0.000000000  | 0.863136000  | 0.000000000  |
| B | 1.004198000  | 2.150538000  | 0.000000000  |
| H | 1.385519000  | 2.648226000  | -1.020881000 |
| B | 0.459265000  | -0.875206000 | 0.000000000  |
| B | -1.007618000 | -1.777722000 | 0.000000000  |
| H | -1.602608000 | -2.800670000 | 0.000000000  |
| H | 0.227143000  | -2.193614000 | 0.000000000  |
| H | 1.644360000  | -1.001729000 | 0.000000000  |

**11**

CCSD(T)/aug-cc-pvtz//TPSS/def2-TZVP

G = -126.81492 a.u.

|   |              |              |              |
|---|--------------|--------------|--------------|
| B | -1.812988000 | -0.348014000 | -0.054888000 |
| H | -2.658809000 | -1.166543000 | -0.060218000 |
| H | -1.681295000 | 0.443845000  | 0.981391000  |
| B | 1.648325000  | -0.525201000 | 0.020755000  |
| H | 2.755950000  | -0.919480000 | -0.001950000 |
| H | 0.759059000  | -1.601769000 | -0.011585000 |
| H | 1.601182000  | 1.761556000  | 0.013691000  |
| B | -0.876361000 | 0.817513000  | -0.167737000 |
| B | 0.800614000  | 0.888950000  | 0.019860000  |
| B | 0.085192000  | -0.536770000 | -0.002256000 |

**12**

CCSD(T)/aug-cc-pvtz//TPSS/def2-TZVP

G = -126.81265 a.u.

|   |              |              |              |
|---|--------------|--------------|--------------|
| B | -0.401311000 | -0.943809000 | -0.356389000 |
| B | 1.132888000  | 0.637016000  | -0.438505000 |
| H | 2.032620000  | 1.011317000  | -1.110304000 |
| H | 0.316254000  | 1.584973000  | -0.341411000 |
| B | 0.983203000  | -0.823347000 | 0.331461000  |
| H | 1.901095000  | -1.370469000 | 0.841204000  |
| H | -0.504231000 | 1.382114000  | 1.457095000  |
| H | -2.786456000 | 0.263218000  | -0.120344000 |
| B | -1.669224000 | -0.095572000 | -0.234944000 |
| B | -0.237412000 | 0.651482000  | 0.553129000  |

**13**

CCSD(T)/aug-cc-pvtz//TPSS/def2-TZVP



G = -126.80911 a.u.

|   |             |             |             |
|---|-------------|-------------|-------------|
| H | 0.00000000  | 2.23465300  | 0.00300000  |
| B | 0.00000000  | 0.00000000  | 1.35093200  |
| H | 0.00000000  | 0.00000000  | 2.52926800  |
| B | 0.00000000  | 1.04626800  | -0.00064100 |
| H | 0.00000000  | 0.00000000  | -2.52919500 |
| B | -0.90609500 | -0.52313400 | -0.00064100 |
| H | -1.93526600 | -1.11732600 | 0.00300000  |
| B | 0.00000000  | 0.00000000  | -1.35082400 |
| B | 0.90609500  | -0.52313400 | -0.00064100 |
| H | 1.93526600  | -1.11732600 | 0.00300000  |

**14**

CCSD(T)/aug-cc-pvtz//TPSS/def2-TZVP

G = -126.78052 a.u.

|   |             |             |             |
|---|-------------|-------------|-------------|
| H | -2.47562200 | -0.38242600 | -0.14163300 |
| B | -1.33054400 | -0.09300700 | -0.18165000 |
| H | -1.34549700 | 1.18268800  | 0.19524500  |
| B | 0.05832700  | -0.40638100 | -1.00627700 |
| H | 2.53232800  | 0.23151300  | -0.10037400 |
| B | 0.11809500  | -0.77383200 | 0.68425800  |
| H | 0.16808400  | -1.56227100 | 1.56774400  |
| B | 1.38258400  | -0.00039600 | -0.21753400 |
| B | -0.05961000 | 0.96815400  | 0.29096500  |
| H | 0.27644700  | 2.05780700  | 0.63020700  |

**a) Ts<sub>3-1</sub>**

CCSD(T)/aug-cc-pvtz//TPSS/def2-TZVP

G = - 126.80018 a.u.

|   |            |            |            |
|---|------------|------------|------------|
| H | -2.6450750 | -0.2072860 | 0.0132090  |
| B | 0.0936100  | -0.5122340 | -0.3379490 |
| B | 0.8407370  | 0.8882780  | 0.3666440  |
| H | -1.4088140 | -1.5555870 | 0.9224650  |
| B | -0.6210230 | 1.0388190  | -0.1660660 |
| B | 1.7866580  | -0.2809250 | 0.0751800  |
| H | 2.7045060  | -0.9699100 | -0.1915140 |
| B | -1.5467970 | -0.6166190 | 0.1972980  |
| H | -1.4649610 | 1.7522000  | -0.5793500 |
| H | 0.0484180  | -1.6060120 | -0.8403430 |

**b) Ts<sub>2-1</sub>**

CCSD(T)/aug-cc-pvtz//TPSS/def2-TZVP

G = -126.83002 a.u.

|   |            |            |            |
|---|------------|------------|------------|
| B | 0.0735070  | -0.4070000 | -0.4918120 |
| B | -1.4218800 | -0.7229160 | 0.1419950  |
| H | -2.0807220 | -1.6900510 | -0.0436000 |
| B | 1.4985210  | -0.7250630 | 0.0747470  |
| H | 2.4003200  | -1.4553550 | 0.2830010  |
| H | 1.5474060  | 1.8523520  | 0.1906120  |
| B | -0.7798730 | 0.8969710  | -0.1038700 |
| H | -1.8442580 | 0.0563940  | 0.9913080  |
| B | 0.9274780  | 0.8416770  | 0.1397270  |
| H | -1.5115110 | 1.8183130  | -0.2252570 |

**b) Ts<sub>4-2</sub>**

CCSD(T)/aug-cc-pvtz//TPSS/def2-TZVP

G = -126.82625 a.u.

|   |            |            |            |
|---|------------|------------|------------|
| H | 1.1530480  | 1.9107430  | -0.5327250 |
| B | 0.5713200  | 0.9528730  | -0.1602750 |
| H | 2.6451220  | -0.5018380 | -0.5955920 |
| B | 0.0488020  | -0.4544490 | 0.3356810  |
| H | -2.0818050 | -1.6911350 | -0.6445360 |
| B | -1.1009780 | 0.7595750  | 0.1122680  |
| H | -1.7541470 | 1.6346070  | 0.5871250  |
| B | -1.4260550 | -0.8037900 | -0.2240670 |
| B | 1.6188290  | -0.4748000 | -0.0121680 |
| H | 1.4781960  | -1.2494180 | 0.9285370  |

**b) Ts<sub>7-4</sub>**

CCSD(T)/aug-cc-pvtz//TPSS/def2-TZVP

G = - 126.82903 a.u.

|   |            |            |            |
|---|------------|------------|------------|
| H | -1.4137250 | 0.2188720  | 1.2774880  |
| B | 0.0260150  | -1.0347030 | -0.3291380 |
| H | -0.1224030 | -1.9441010 | -1.0704050 |
| B | -0.1524130 | 0.0974760  | 0.8194690  |
| H | 0.2515460  | 2.0153060  | -1.0569750 |
| B | -1.4287930 | 0.0118220  | -0.0317460 |
| H | -2.4791920 | 0.1473490  | -0.5405080 |
| B | 0.4192720  | 1.0631260  | -0.3766710 |

|   |           |            |           |
|---|-----------|------------|-----------|
| B | 1.3882370 | -0.1457900 | 0.1118920 |
| H | 2.5021890 | -0.3970870 | 0.4213660 |
